# Supplementary material for: Multiple on-line active valves based centrifugal microfluidics for dynamic solid-phase enrichment and purification of viral nucleic acid
Source: Royal Society of Chemistry journal article supplement (doi:10.1039/d4lc00074a), 2024-01-01
Supplement: d4lc00074a1.pdf [file d4lc00074a1.pdf]

Electronic supplementary information for

## Multiple On-line Active Valves Based Centrifugal Microfluidics for

## Dynamic Solid-Phase Enrichment and Purification of Viral Nucleic Acid

Shunji Li ‡<sup>a</sup>, Chao Wan ‡<sup>a</sup>, Yujin Xiao ‡<sup>a</sup>, Changgen Liu <sup>b</sup>, Xudong Zhao <sup>a</sup>, Ying Zhang <sup>a</sup>, Huijuan Yuan <sup>a</sup>,  
Liqiang Wu <sup>b</sup>, Chungeng Qian <sup>b</sup>, Yiwei Li <sup>a</sup>, Peng Chen <sup>\*a</sup>, Bi-Feng Liu<sup>\*a</sup>

*<sup>a</sup>The Key Laboratory for Biomedical Photonics of MOE at Wuhan National Laboratory for Optoelectronics-Hubei Bioinformatics & Molecular Imaging Key Laboratory, Systems Biology Theme, Department of Biomedical Engineering, College of Life Science and Technology, Huazhong University of Science and Technology, Wuhan, 430074, China.*

*<sup>b</sup>Department of Reagent Research and Development, Shenzhen YHLO Biotech Co., Ltd., Shenzhen, Guangdong, China.*

### **This PDF file includes:**

- Figure S1. Physical representations of the chip layers.
- Figure S2. Assembly of the chip.
- Figure S3. Schematic diagram of the puncture valve motor.
- Figure S4. Schematic diagram of the returnable valves.
- Figure S5. Centrifugal tube clamp dimension selection.
- Figure S6. Performance evaluation of the returnable valves.
- Figure S7. Concentration amplification plot of three target genes in the standard samples.
- Figure S8. Evaluation of magnetic bead loss rate.
- Table S1. Detailed manual operational procedures
- Table S2. Target gene sequences and corresponding primer sequences
- Table S3. Performance evaluation of functional trays.
- Table S4. Detailed operational procedures.
- Table S5. Evaluation of nucleic acid enrichment efficiency for pseudo-virus.

### **Other Supplementary Material for this manuscript includes the following:**

- Video S1. Operation of puncture valves.
- Video S2. Operation of returnable valves.
- Video S3. Operation of magnetic valve.
- Video S4. The tolerable range of centrifugal speed for the RV.
- Video S5. Demonstration of bead mixing efficiency.
- Video S6. The functional presentation of magnetic bead fixation, waste removal and solution collection.
- Video S7. Presentation of the effects of multiple reagents released in sequence on demand.

**Figure S1**

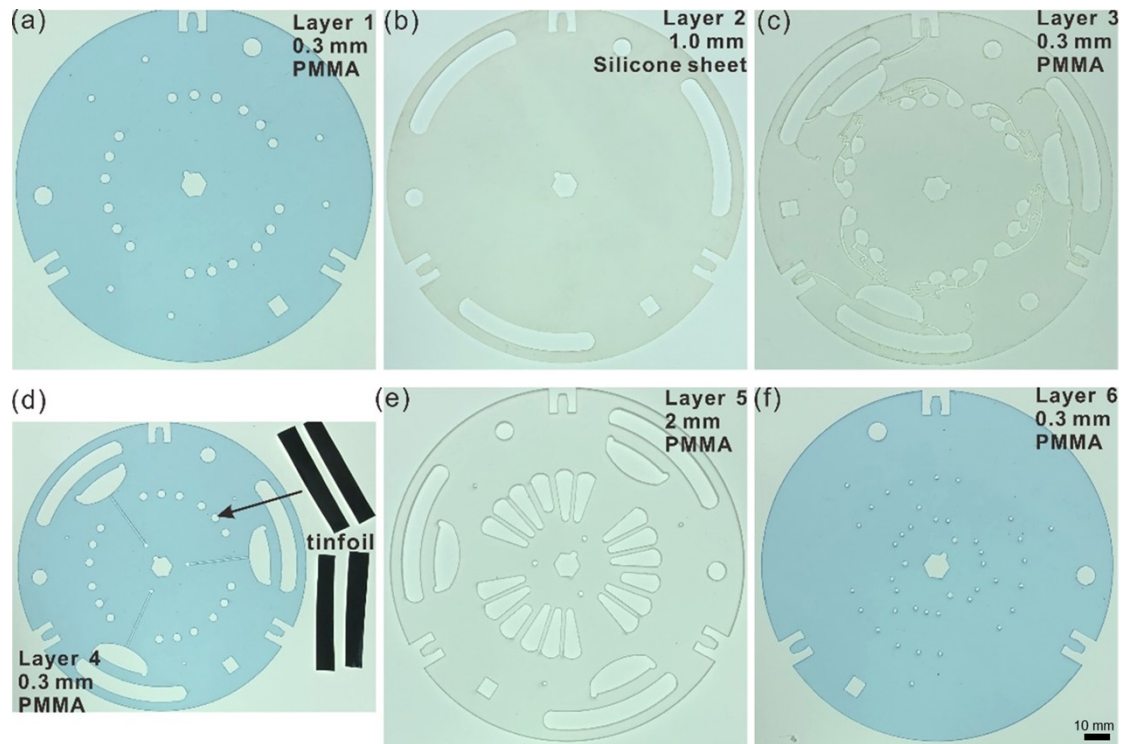

Figure S1: Physical representations of the chip layers: (a) Bottom cover layer - 0.3 mm PMMA; (b) Elastic silicone layer - 1 mm; (c) Drainage layer - 0.3 mm PMMA; (d) Tin foil layer - 0.3 mm PMMA; (e) Liquid storage or reagent layer - 2 mm PMMA; (f) Top cover layer - 0.3 mm PMMA.

**Figure S2**

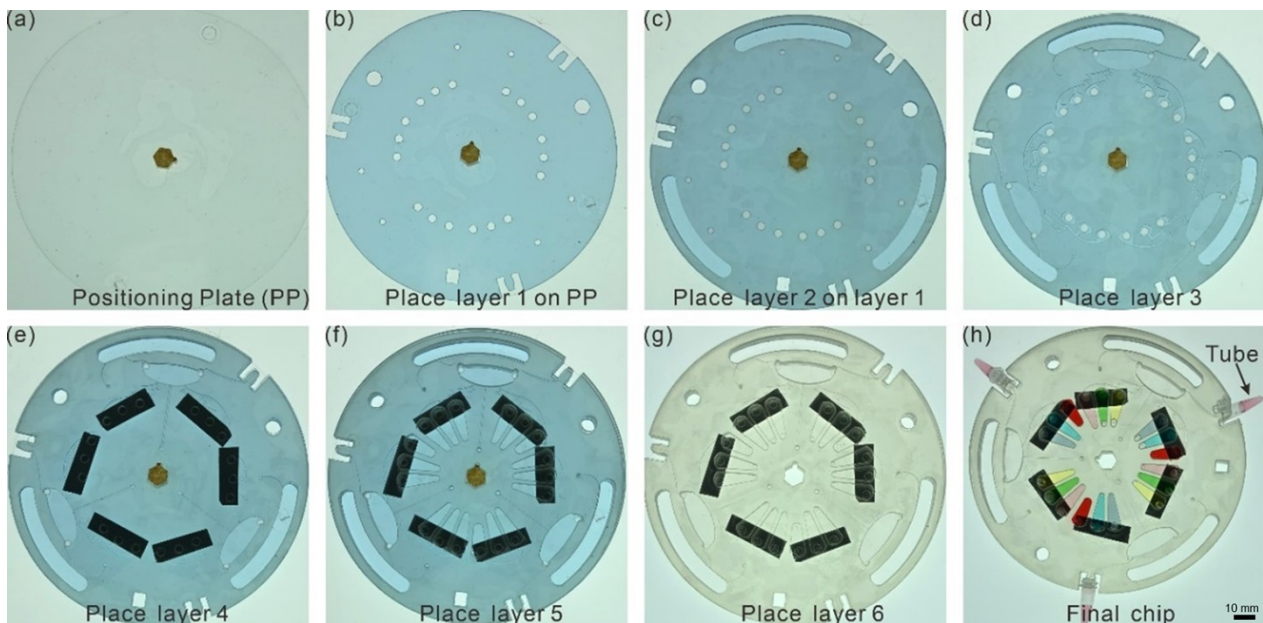

Figure S2: Assembly of the chip: (a) Positioning disc; (b) Assembly of the bottom layer - first layer; (c) Assembly of the second layer; (d) Assembly of the third layer; (e) Assembly of the fourth layer, paying attention to first place the tin foil strip at the corresponding position on the back of this layer; (f) Assembly of the fifth layer; (g) Assembly of the sixth layer, completing the main structure of the chip; (h) Assembly of the centrifuge tube used for collecting purified nucleic acid.

**Figure S3**

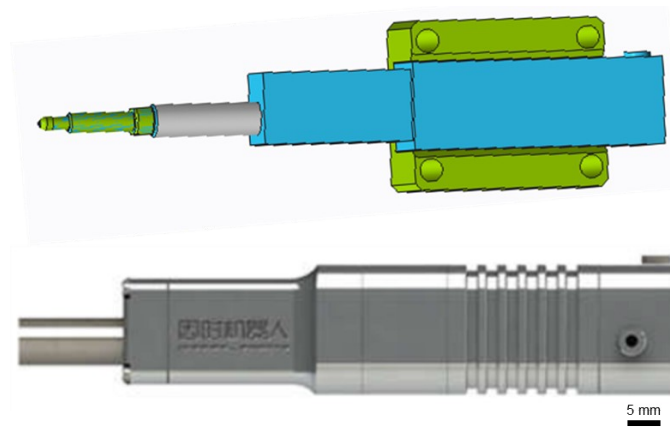

Figure S3: Schematic diagram of the puncture valve motor (top) and its physical representation (bottom, purchased from Beijing Yinshi Robotics Company, total travel distance of 10 mm, using TTL serial communication).

**Figure S4**

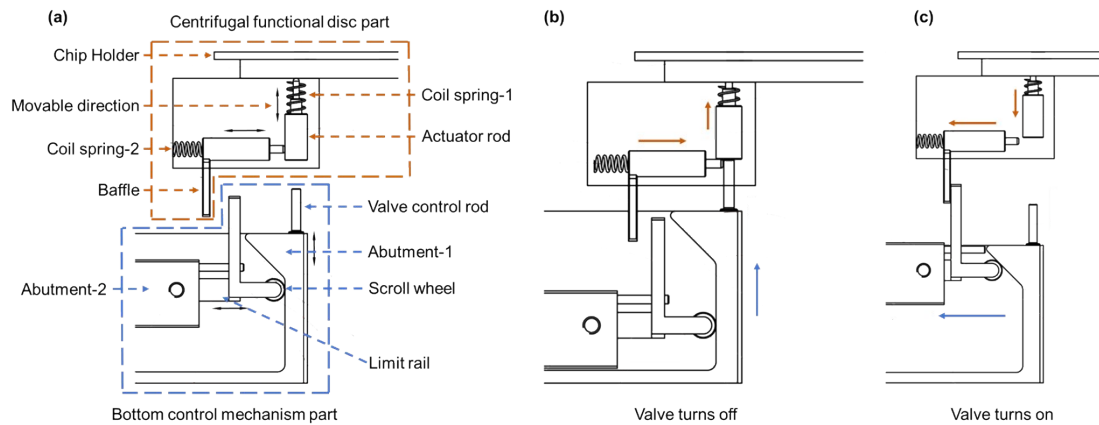

Figure S4: The mechanical structure and principle diagram of the returnable valves. (a). Plan view of the key parts of the centrifugal function disk and the bottom mechanical control structure; (b). Valve turns off: coil spring-1 would be moved upward and coil spring-2 would be moved to the right due to the need of the automatic reset of the coil, and when the mechanical control structure is left, the actuator rod would be fixed above due to coil spring-2; (c). Valve turns on: coil spring-2 would be moved to the left and coil spring-1 would be moved down due to the need of the automatic reset of the coil, ultimately causing the actuator rod to be fixed below.

**Figure S5**

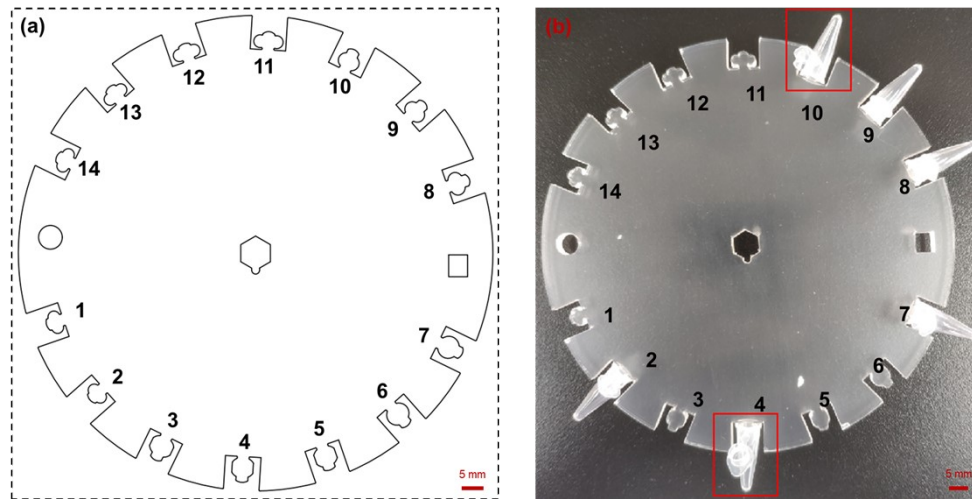

Figure S5: Centrifuge tube clamp dimension selection. (a) 14 centrifuge tube clamp designs. (b) Physical image of centrifuge tube fixation effect after centrifugation at 1500 RPM.

**Figure S6**

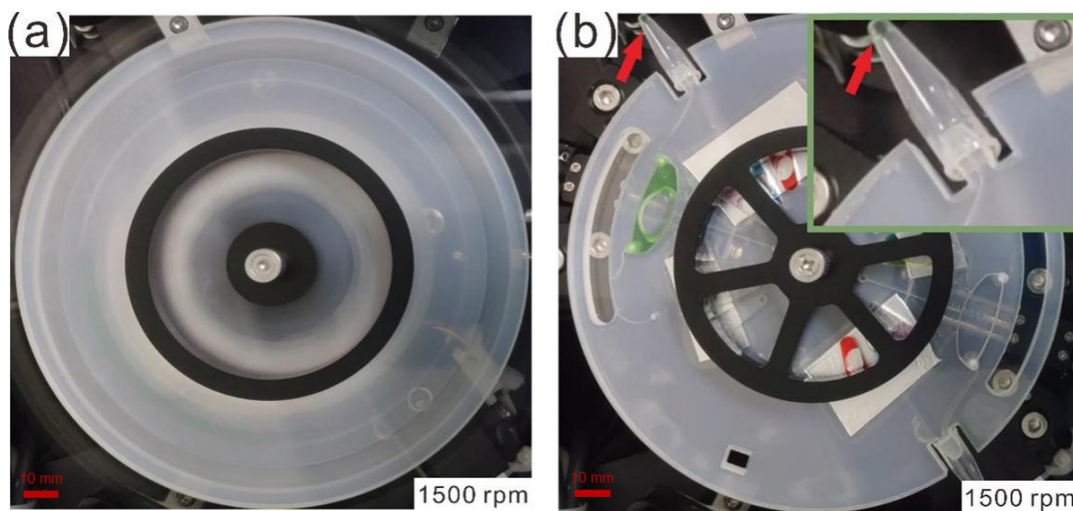

Figure S6: Performance evaluation of the reversible valve: (a) During centrifugation at 1500 rpm; (b) Physical image after centrifugation at 1500 rpm, liquid appears inside the centrifuge tube at the location indicated by the red arrow.

**Figure S7**

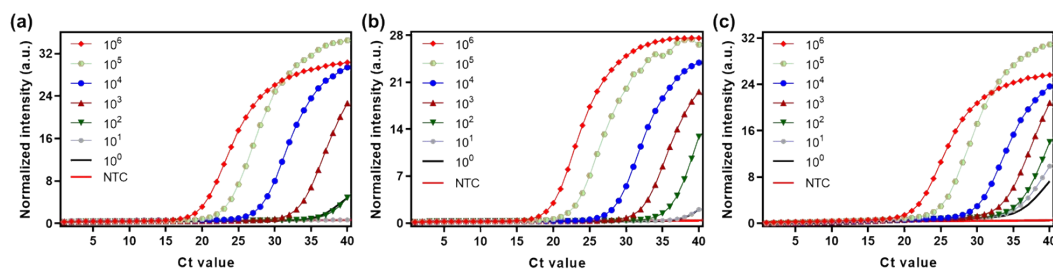

Figure S7: Concentration amplification plot of three target genes in the standard samples: (a) orflab gene; (b) N gene; (c) E gene.

**Figure S8**

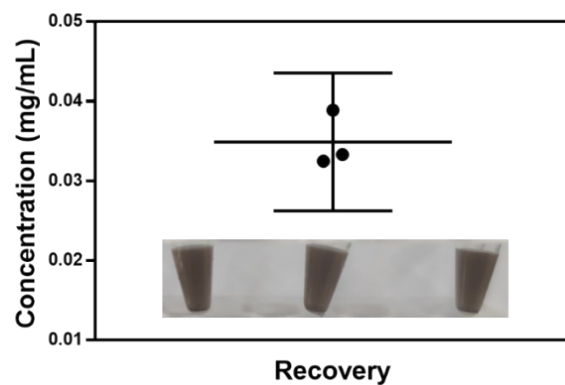

Figure S8: Evaluation of magnetic bead loss rate (from left to right: before extraction, after one round of magnetic actuation and removal of the supernatant, after two rounds of magnetic actuation and removal of the supernatant).

**Table S1**

Table S1 Detailed manual operational procedures

| Step | Operation                                                                    | Duration |
|------|------------------------------------------------------------------------------|----------|
| 1    | Adding sample                                                                | 1 min    |
| 2    | adding the lysis buffer                                                      | 1 min    |
| 3    | Shock mixing the magnetic beads with the sample and reagents                 | 2 min    |
| 4    | Incubation at room temperature                                               | 10 min   |
| 5    | The centrifugal tube is placed on the magnetic rack and draws the liquid     | 6 min    |
| 6    | Adding wash 1 buffer and mixing                                              | 2 min    |
| 7    | The centrifugal tube is placed on the magnetic rack and draws the liquid     | 6 min    |
| 8    | Adding wash 2 buffer and mixing                                              | 2 min    |
| 9    | The centrifugal tube is placed on the magnetic rack and draws the liquid     | 6 min    |
| 10   | Adding wash 2 buffer and mixing                                              | 2 min    |
| 11   | The centrifugal tube is placed on the magnetic rack and draws the liquid     | 6 min    |
| 12   | Drying of magnetic beads                                                     | 10 min   |
| 13   | Adding elution buffer and mixing                                             | 3 min    |
| 14   | Incubation at 65°C                                                           | 5 min    |
| 15   | The centrifugal tube is placed on the magnetic rack and draws elution buffer | 6 min    |
| 16   | Overall time                                                                 | 68 min   |

**Table S2**

Table S2 Target gene sequences and corresponding primer sequences

| SARS-Cov-2 gene | Target gene sequences (5'-3')                                                                                                                                                           | Primer sequences (5'-3')                |
|-----------------|-----------------------------------------------------------------------------------------------------------------------------------------------------------------------------------------|-----------------------------------------|
| N               | CCAAAAGGCTTCTACGCAGAAGGGAGCAGAGGC<br>GGCAGTCAAGCCTCTTCTCGTTCCTCATCACGTA<br>GTCGCAACAGTTCAAGAAATTCAACTCCAGGCA<br>GCAGTAGGGGAAGTTCTCCTGCTAGAATGGCTG<br>GCAATGGCGGTGATGCTGCTCTTGCTTTGCTGCT | F:<br>GGGGAAGTTCTCCT<br>GCTAGAAT;<br>B: |

|                                     |                                     |                |
|-------------------------------------|-------------------------------------|----------------|
| Orflab                              | GCTTGACAGATTGAACCAGCTTGAGAGCAAAAT   | CAGACATTTTGCTC |
|                                     | GTCTGGTAAAGGCCAACAACAAGGCCAAAC      | TCAAGCTG       |
|                                     | TGCTACTAAGAAATCTGCTGCTGAGGCTTCTAAG  |                |
|                                     | AAGCCTCGCAAAAACGT                   |                |
|                                     | ATCGTGTGTCTGTACTGCCGTTGCCACATAGAT   |                |
|                                     | CATCCAAATCCTAAAGGATTTTGTGACTTAAAAG  |                |
|                                     | GTAAGTATGTACAAATACCTACAACCTTGTGCTAA | F:             |
|                                     | TGACCCTGTGGGTTTTACACTTAAAACACAGTC   | CCCTGTGGGTTTTA |
|                                     | TGTACCGTCTGCGGTATGTGGAAAGGTTATGGCT  | CACTTAA;       |
|                                     | GTAGTTGTGATCAACTCCGCGAACCCATGCTTCA  | B:             |
| GTCAGCTGATGCACAATCGTTTTTAAACGGGTTT  | ACGATTGTGCATCA                      |                |
| GCGGTGTAAGTGCAGCCCGTCTTACACCGTGCGG  | GCTGA                               |                |
| CACAGGCACTAGTACTGATGTTCGTATACAGGGCT |                                     |                |
| TTTGACATCTACAATGATAAAGTAGCTGGTTTTG  |                                     |                |
| CTAAATTCCTAAAACTAATTGTTGT           |                                     |                |
| ATGTACTCATTCGTTTTCGGAAGAGACAGGTACGT | F:                                  |                |
| TAATAGTTAATAGCGTACTTCTTTTTCTTGCTTTC | ACAGGTACGTTAAT                      |                |
| GTGGTATTCTTGCTAGTTACACTAGCCATCCTTA  | AGTTAATAGCGT;                       |                |
| CTGCGCTTCGATTGTGTGCGTACTGCTGCAATAT  | B:                                  |                |
| TGTTAACGTGAGTCTTGTAACCTTCTTTTTAC    | ATATTGCAGCAGTA                      |                |
| GTTTACTCTCGTGTTAAAAATCTGAATTCTTCTA  | CGCACACA                            |                |
| GAGTTCCTGATCTTCTGGTCTAA             |                                     |                |

**Table S3**

Table S3 Performance evaluation of functional trays

| Modules | Puncture valve |                 | Reversible valve |         | Mixture   |         |
|---------|----------------|-----------------|------------------|---------|-----------|---------|
|         | Distance (mm)  | Results         | Speed (rpm)      | Results | Angle (°) | Results |
| 1       | 0.1            | Unpierced       | 500              | Storage | 5         | No      |
| 2       | 0.5            | Unpierced       | 800              | Storage | 10        | No      |
| 3       | 1              | Unpierced       | 1000             | Storage | 20        | No      |
| 4       | 1.5            | Pierced         | 1300             | Storage | 30        | Yes     |
| 5       | 2              | Silicon rupture | 1500             | Leakage | 40        | Yes     |

**Table S4**

Table S4 Detailed operational procedures

| Step | Operation                              | RV-1 | RV-2 | Rotation    | Duration |
|------|----------------------------------------|------|------|-------------|----------|
|      |                                        |      |      | speed (rpm) |          |
| 1    | Adding sample                          | off  | off  | 1000        | 10 s     |
| 2    | Puncture the lysis reagent chamber and | off  | off  | 1000        | 15 s     |

| Step | Operation                                                           | RV-1 | RV-2 | Rotation speed (rpm)                                                            | Duration |
|------|---------------------------------------------------------------------|------|------|---------------------------------------------------------------------------------|----------|
|      | release the lysis buffer                                            |      |      |                                                                                 |          |
| 3    | Puncture the binding reagent chamber and release the binding buffer | off  | off  | 1000                                                                            | 15 s     |
| 4    | Thoroughly mixing the magnetic beads with the sample and reagents   | off  | off  | Mixing by spinning the centrifuge back and forth with a deflection angle of 30° | 10 min   |
| 5    | Capture of magnetic beads                                           | off  | off  | 0                                                                               | 15 s     |
| 6    | Transfer waste solution to waste chamber                            | on   | off  | 3000                                                                            | 10 s     |
| 7    | De-magnetization                                                    | off  | off  | 0                                                                               | 5 s      |
| 8    | Puncture the wash 1 reagent chamber and release the wash 1 buffer   | off  | off  | 1000                                                                            | 15 s     |
| 9    | Thoroughly mixing the magnetic beads with wash 1 buffer             | off  | off  | Mixing by spinning the centrifuge back and forth with a deflection angle of 30° | 15 s     |
| 10   | Capture of magnetic beads                                           | off  | off  | 0                                                                               | 15 s     |
| 11   | Transfer waste solution to waste chamber                            | on   | off  | 3000                                                                            | 10 s     |
| 12   | De-magnetization                                                    | off  | off  | 0                                                                               | 5 s      |
| 13   | Puncture the wash 2 reagent chamber and release the wash 2 buffer   | off  | off  | 1000                                                                            | 15 s     |
| 14   | Thoroughly mixing the magnetic beads with wash 2 buffer             | off  | off  | Mixing by spinning the centrifuge back and forth with a deflection angle of 30° | 15 s     |
| 15   | Capture of magnetic beads                                           | off  | off  | 0                                                                               | 15 s     |
| 16   | Transfer waste solution to waste chamber                            | on   | off  | 3000                                                                            | 10 s     |



| Step | Operation                                                           | RV-1 | RV-2 | Rotation speed (rpm)                                                            | Duration |
|------|---------------------------------------------------------------------|------|------|---------------------------------------------------------------------------------|----------|
| 17   | De-magnetization                                                    | off  | off  | 0                                                                               | 5 s      |
| 18   | Drying of magnetic beads                                            | off  | off  | 0                                                                               | 10 min   |
| 19   | Puncture the elution reagent chamber and release the elution buffer | off  | off  | 1000                                                                            | 15 s     |
| 20   | Thoroughly mixing the magnetic beads with the elution buffer        | off  | off  | Mixing by spinning the centrifuge back and forth with a deflection angle of 30° | 5 min    |
| 21   | Capture of magnetic beads                                           | off  | off  | 0                                                                               | 15 s     |
| 22   | Transfer nucleic acid solution to tube                              | off  | on   | 3000                                                                            | 10 s     |

**Table S5**

Table S5 Evaluation of nucleic acid enrichment efficiency for pseudo-virus

| SARS-Cov-2 gene | Manual    |                                  | Chip      |                                  | Chip/Manual (%) |
|-----------------|-----------|----------------------------------|-----------|----------------------------------|-----------------|
|                 | CT values | Concentrations (copies/ $\mu$ L) | CT values | Concentrations (copies/ $\mu$ L) |                 |
| N               | 27.33     | 6760.83                          | 24        | 41686.94                         | 616.60          |
| Orflab          | 26.33     | 7943.28                          | 22.67     | 61659.50                         | 776.25          |
| E               | 26.66     | 3630.78                          | 21.66     | 162181.01                        | 4466.84         |
